# Supplementary material
Source: publisher figshare collection journal article supplement (https://sage.figshare.com/ndownloader/files/25890484)
Supplement: Supplementary file 1 [file 25890484]

## Sheet: General
Sources for the typicality study
Most numbers were found at Global Health Data Exchange: http://ghdx.healthdata.org/
Whenever available, the numbers are from 2010
Data was collected in July 2019.

## Sheet: Prevalence
Most numbers were found at Global Health Data Exchange: http://ghdx.healthdata.org/
CASES	Prevalence rate pr 100 000
ADHD	from GBD:
Agoraphobia	https://www.uptodate.com/contents/agoraphobia-in-adults-epidemiology-pathogenesis-clinical-manifestations-course-and-diagnosis, 0.9% of U.S. adults had agoraphobia in the past year.
AIDS	from GBD:
Alcoholism	from GBD:
AnginaPectoris	6,7%women, 5,7% men: https://www.ahajournals.org/doi/10.1161/circulationaha.107.720953
ankylosis	1% of US adults, or an estimated 2.7 million persons.	‘other musculoskeletal conditions’, including juvenile arthritis and ankylosing spondylitis, other musc.: prevalence rate 4000. Should be 1000 = 1/4.
Anorexia	from GBD:
anxietyneurosis	from GBD: anxiety disorders
Appendicitis	from GBD:
Aspergers	from GBD: autism specter disorders
Asthma	from GBD:
BPD	a point prevalence in the United States general population estimated to be 1.6 percent: https://www.uptodate.com/contents/borderline-personality-disorder-epidemiology-pathogenesis-clinical-features-course-assessment-and-diagnosis
caffeineaddiction	USA: https://www.cdc.gov/fungal/diseases/candidiasis/invasive/statistics.html & https://www.ahajournals.org/doi/10.1161/circulationaha.107.720953
Candida	https://www.gaffi.org/wp-content/uploads/How-Common-are-Fungal-Diseases-v12.2.pdf
Cardioinfarct	from GBD:
Cataracts	from GBD:
cirrhosis	from GBD:
clamydia	from GBD:
Colaaddiction	missing figures; probably low prevalence = 0
coloncancer	from GBD:
Dementia	from GBD:
Diabetes	from GBD:
Dissidens	0
Drapetomania	0
duodenalulcer	from GBD: peptic ulcer
Dysmorphophobia	0,7 to 2,4 : https://www.ncbi.nlm.nih.gov/pmc/articles/PMC3181960/
ectopicpregnancy	from GBD: rate among women
ED	5 to 20% of men, https://www.ncbi.nlm.nih.gov/pubmed/12605242
El-alergi	sweden: http://www.sjweh.fi/download.php?abstract_id=644&file_nro=1
Fibromyalgia	0,2 to 6,6: https://www.ncbi.nlm.nih.gov/pubmed/28743363		Chugh, S. S., Havmoeller, R., Narayanan, K., Singh, D., Rienstra, M., Benjamin, E. J., ... & Forouzanfar, M. H. (2014). Worldwide epidemiology of atrial fibrillation: a Global Burden of Disease 2010 Study. Circulation, 129(8), 837-847.
gamblingaddiction	0,1 to 6 , https://www.who.int/substance_abuse/activities/fadab/abbot_gambling_forum.pdf?ua=1
Gulfwarsyndrome	250000 individuals divided by US population: http://www8.nationalacademies.org/onpinews/newsitem.aspx?RecordID=12835
hipfracture	1,66 millions in 1990 divided by world population, 5,2billion
Homosexuality	https://www.sciencedirect.com/topics/immunology-and-microbiology/homosexuality
IBS	from GBD: inflammatory bowel disease
Infertility
kidneyfailure	from GBD: chronic kidney disease
kidneystones	5,6% 1990s: https://www.ncbi.nlm.nih.gov/pmc/articles/PMC2931286/
Kleptomania	0,6% US: https://www.ncbi.nlm.nih.gov/pmc/articles/PMC535651/
Leukemia	from GBD:
Lumbago	from GBD:
lungcancer	Tracheal, bronchus, and lung cancer
ME	US: https://www.ncbi.nlm.nih.gov/pmc/articles/PMC6331450/
mediavictimsyndrome	0
Menopause	48,8 years mean:female pop 2010: 750 436 000 / 6,956,824,000 Symptoms of menopause — global prevalence, physiology and implications. https://population.un.org/
Miscarriage
MS	from GBD:
Nostalgia	0
obesity	2016: https://www.who.int/news-room/fact-sheets/detail/obesity-and-overweight
opioidaddiction	from GBD:
PMS	47.8%: https://www.ncbi.nlm.nih.gov/pmc/articles/PMC3972521/
pollenallergy	https://www.worldallergy.org/UserFiles/file/waw16-slide-set.pdf
pornaddiction	australia: 1%women 4% men https://www.tandfonline.com/doi/abs/10.1080/00224499.2016.1191597?journalCode=hjsr20
pregnancy	213million pregnancies, world pop 7,125,828, 000https://www.ncbi.nlm.nih.gov/pmc/articles/PMC4727534/
Prolaps	finland/italia: 1-3% https://www.ncbi.nlm.nih.gov/pmc/articles/PMC2907819/
Psoriasis	from GBD:
rheumatoidarthritis	from GBD:
rupturedspleen	No available information found
Schizophrenia	from GBD:
Selfharm	from GBD:
Shoppingaddiction	USA: https://www.ncbi.nlm.nih.gov/pmc/articles/PMC1805733/

## Sheet: Fame
Information on media coverage was found at https://www.retriever-info.com/
The search was performed on Norwegian newspaper articles in print and online in 2010-2015.
To avoid overestimating disambiguous terms such as pregnancy and nostalgia, the search string required inclusion of terms related to disease, sickness, suffering or diagnosis.
CASES	Search string (AND (syk* OR lidelse OR plage OR diagnos*))
ADHD	ADHD OR AD-HD OR AD.HD
Agoraphobia	agorafobi OR agoraphobi
AIDS	AIDS OR HIV	AIDS
Alcoholism	alkoholisme OR alkoholiker	Alkoholisme
AnginaPectoris	angina
ankylosis	bekthere* OR ankylose*
Anorexia	anorek*
anxietyneurosis	angstnevro* OR angst
Appendicitis	appendisitt OR blindtarm*
Aspergers	asperger* OR asberger*
Asthma	astma* OR asthma*
BPD	borderline	borderline personlighetsforstyrrelse
caffeineaddiction	koffeinavheng* OR kaffeavheng*
Candida	candida OR candidi*
Cardioinfarct	hjerteinfarkt
Cataracts	"grå stær" OR katarakt
cirrhosis	skrumplever OR *cirrhose
clamydia	clamydia OR klamydia OR chlamydia
Colaaddiction	colaavheng* OR "cola avheng*
coloncancer	tykktarmkreft OR "tykktarm kreft"	tykktarmkreft
Dementia	demens OR dement
Diabetes	diabet*
Dissidens	dissidens (to saker som ikke handler om lidelsen)
Drapetomania	(drapetoman* OR rømmesyk*)
duodenalulcer	magesår
Dysmorphophobia	dysmorfofob*
ectopicpregnancy	("ekstrauterin" OR "svangerskap utenfor livmoren" OR "gravid* utenfor livmoren")
ED	erektil dysfunksjon [impoten* gir mange irrelevante treff]
El-alergi	("el-allergi" OR "elallergi" OR "elektrisitetsallergi" OR "elektrisitets allergi" OR "el allergi")
Fibromyalgia
gamblingaddiction	spilleavheng* OR "spille avheng*" OR gamblingavheng*
Gulfwarsyndrome	(golfkrigsyndrom OR gulfkrigsyndrom OR "gulf-war syndrom*")
hipfracture	lårhalsbrudd OR "lårhals brudd" OR "lårhalsfraktur"
Homosexuality	homoseks*
IBS	IBS OR "irritabel tarm*" OR "irritable bowel syndrome"
Infertility	infertilitet OR ufruktbarhet
kidneyfailure	nyresvikt OR "nyre svikt"
kidneystones	nyrestein OR "nyre stein"
Kleptomania	kleptoman*
Leukemia	leukemi OR blodkreft
Lumbago	lumbago
lungcancer	lungekreft OR lunge kreft
ME	"ME-syk*" OR "ME-diagnos*" OR ME-CFS OR "kronisk utmattelse*"
mediavictimsyndrome	medieoffersyndrom OR mediaoffersyndrom OR "medie offer syndrom" OR "media offer syndrom"
Menopause	menopause OR overgangsalder	menopause
Miscarriage	spontanabort
MS	"MS-syk*" OR "MS-diagnos*" OR "multippel sklerose" OR "multiple sclerose"
Nostalgia	nostalgi [-nostalgiker]	nostalgi
obesity	fedme
opioidaddiction	opioidavheng*" OR "opioid avheng*" OR "heroinavheng*" OR "heroin avheng*"	opioidavheng*" OR "opioid avheng*"
PMS	PMS OR "premenstr*" OR "pre-menstr*"	PMS
pollenallergy	pollenallergi OR "pollen allergi"	pollenallergi* OR "pollen allergi*"
pornaddiction	*pornoavheng* OR "*porno avheng*"
pregnancy	graviditet
Prolaps	prolaps OR skiveut*	prolaps
Psoriasis	psoriasis
rheumatoidarthritis	leddgikt OR revmatoid artritt	leddgikt
rupturedspleen	miltruptur OR "milt ruptur" OR "sprukken milt"
Schizophrenia	schizofreni OR schizophrenia	schizofren* OR schizophren*
Selfharm	selvskading
Shoppingaddiction	handleavheng* OR "shopping avheng*"	handleavheng* OR "shopping avheng*" OR "shoppinggal" OR "shopping gal" OR "handlegal" OR "handle gal"

## Sheet: Severity
The disability weights are differentiated according to the state of the disease.
For our analyses we used the most severe weights.
For diseases/conditions lacking weights, we used the most similar available weights.
CASES	Disability_weights_severe	Disability weights mild
ADHD	https://www.who.int/healthinfo/statistics/GlobalDALYmethods_2000_2011.pdf
Agoraphobia	same as anxiety
AIDS	AIDS: not receiving antiretroviral treatment	HIV/AIDS: receiving antiretroviral treatment
Alcoholism	Alcohol use disorder: severe	Alcohol use disorder: mild
AnginaPectoris	Angina pectoris: severe	Angina pectoris: mild
ankylosis	Musculoskeletal problems: generalised, severe	Musculoskeletal problems: generalised, moderate
Anorexia
anxietyneurosis	Anxiety disorders: severe	Anxiety disorders: mild
Appendicitis	Appendicitis(2017)
Aspergers	Asperger’s syndrome
Asthma	Asthma: uncontrolled	Asthma: controlled (2017)
BPD	Post-traumatic stress disorder - Cases 0.105
caffeineaddiction	0
Candida	similar to periodontitis (gingivitis) 0,007 https://www.thelancet.com/journals/langlo/article/PIIS2214-109X(15)00069-8/fulltext
Cardioinfarct	Acute myocardial infarction: days 1-2	Acute myocardial infarction: days 3-28
Cataracts	Cataracts Blindness (2004)	Cataracts Low vision (2004
cirrhosis	Decompensated cirrhosis of the live
clamydia	Mild chlamydial infection (2017)	Epididymo-orchitis due to chlamydial infection (2017)
Colaaddiction	0
coloncancer	Terminal phase of colon and rectum cancers (2017)	Controlled phase of colon and rectum cancers (2017)
Dementia	Dementia: severe	Dementia: mild
Diabetes	Uncomplicated diabetes mellitus type 1	Uncomplicated diabetes mellitus type 1
Dissidens	0
Drapetomania	0
duodenalulcer	Moderate symptomatic peptic ulcer disease without anemia (2017)	Asymptomatic peptic ulcer disease with mild anemia (2017)
Dysmorphophobia	Similar to Anxiety disorders: mild	Anxiety disorders: mild
ectopicpregnancy	Ectopic Pregnancy (2017)
ED	Impotence
El-alergi	Similar to Anxiety disorders: mild
Fibromyalgia	Musculoskeletal problems: generalised, severe	Musculoskeletal problems: generalised, moderate
gamblingaddiction	Similar to Anxiety disorders: mild
Gulfwarsyndrome	Similar to Anxiety disorders: mild
hipfracture	Femur fracture (2004)
Homosexuality	0
IBS	IBS: https://www.ncbi.nlm.nih.gov/pmc/articles/PMC4715333/table/Tab3/?report=objectonly	IBS: https://www.ncbi.nlm.nih.gov/pmc/articles/PMC4715333/table/Tab3/?report=objectonly
Infertility	Primary infertility due to congenital genital anomalies (2017)	Primary infertility due to congenital genital anomalies (2017)
kidneyfailure	Chronic kidney disease (stageIV)
kidneystones	Severe urolithiasis episodes (2017)	Mild urolithiasis episodes (2017)
Kleptomania	Similar to Anxiety disorders: mild
Leukemia	Controlled phase of acute lymphoid leukemia (2017)	Terminal phase of chronic lymphoid leukemia (2017)
Lumbago	Low back pain: chronic, with leg pain	Low back pain: : acute (mild)
lungcancer	Terminal phase of lung, bronchus, and trachea cancer (2017)	Controlled phase of lung, bronchus, and trachea cancer (2017)
ME	https://www.oatext.com/Estimating-the-disease-burden-of-MECFS-in-the-United-States-and-its-relation-to-research-funding.php
mediavictimsyndrome	Similar to Anxiety disorders: mild
Menopause	0
Miscarriage	Maternal abortive outcome (2017)
MS	Multiple sclerosis: severe	Multiple sclerosis: mild
Nostalgia	0
obesity	Similar to 1776 Moderate anemia: Feels moderate fatigue, weakness, and shortness of breath after exercise, making daily activities more difficult: 0,05.
opioidaddiction	Severe opioid dependence (2017)	Mild opioid dependence (2017)
PMS	Depression due to premenstrual syndrome (2017)	Abdominal pain due to premenstrual syndrome (2017)
pollenallergy	Allergic rhinitis (hay fever). https://www.ncbi.nlm.nih.gov/pmc/articles/PMC4715333/table/Tab3/?report=objectonly
pornaddiction	Similar to Anxiety disorders: mild
pregnancy	0
Prolaps	Chronic intervertebral disc (2004)	Chronic intervertebral disc (2004)
Psoriasis	mild psoriasis (2017)	Severe psoriasis (2017)
rheumatoidarthritis	Mild rheumatoid arthritis (2017)	Severe rheumatoid arthritis (2017)
rupturedspleen	Internal injuries (2004)
Schizophrenia	Schizophrenia: acute state	Schizophrenia: residual state
Selfharm	similar to anxietyneurosis
Shoppingaddiction	Similar to Anxiety disorders: mild

## Sheet: Infectious
When considering the presence of an infectious agent we created a four-level ordinal scale.
0 indicates no infectious agent
1 indicates that infection is a necessary cause of the disease
0.75 indicates that infections are the most common cause of the disase, but are not necessary
0.25 indicates that infections may cause the disease
CASES	infectious
ADHD
Agoraphobia
AIDS	1
Alcoholism
AnginaPectoris
ankylosis
Anorexia
anxietyneurosis
Appendicitis
Aspergers
Asthma	0,75: https://www.ncbi.nlm.nih.gov/pubmed/24091724
BPD
caffeineaddiction
Candida	1
Cardioinfarct
Cataracts
cirrhosis	0.75
clamydia	1
Colaaddiction
coloncancer
Dementia	0,25: https://www.ncbi.nlm.nih.gov/pubmed/16240484
Diabetes
Dissidens
Drapetomania
duodenalulcer	1
Dysmorphophobia
ectopicpregnancy	0.25
ED	0.25
El-alergi
Fibromyalgia	0.25
gamblingaddiction
Gulfwarsyndrome
hipfracture
Homosexuality
IBS	0.25
Infertility
kidneyfailure	0.25
kidneystones	0.25
Kleptomania
Leukemia
Lumbago
lungcancer
ME	0.25	https://www-sciencedirect-com.ezproxy.uio.no/science/article/pii/S0306987715003825
mediavictimsyndrome
Menopause
Miscarriage	0.25	https://www.ncbi.nlm.nih.gov/pmc/articles/PMC4664130/
MS	1	https://www.ncbi.nlm.nih.gov/pubmed/15721830
Nostalgia
obesity
opioidaddiction
PMS
pollenallergy
pornaddiction
pregnancy
Prolaps
Psoriasis	0.25
rheumatoidarthritis
rupturedspleen
Schizophrenia
Selfharm
Shoppingaddiction

## Sheet: Mortality
Numbers were found at Global Health Data Exchange, unless stated otherwise: http://ghdx.healthdata.org/
Data collected June-July 2019
CASES	Global mortality	Deaths in Norway
ADHD
Agoraphobia
AIDS
Alcoholism
AnginaPectoris
ankylosis
Anorexia
anxietyneurosis
Appendicitis
Aspergers
Asthma
BPD
caffeineaddiction
Candida	https://www.gaffi.org/wp-content/uploads/How-Common-are-Fungal-Diseases-v12.2.pdf
Cardioinfarct
Cataracts
cirrhosis
clamydia
Colaaddiction
coloncancer
Dementia
Diabetes
Dissidens
Drapetomania
duodenalulcer
Dysmorphophobia
ectopicpregnancy
ED
El-alergi
Fibromyalgia
gamblingaddiction
Gulfwarsyndrome
hipfracture	Johnell, O., & Kanis, J. A. (2004). An estimate of the worldwide prevalence, mortality and disability associated with hip fracture. Osteoporosis International, 15(11), 897-902.
Homosexuality
IBS
Infertility
kidneyfailure	https://www.thelancet.com/article/S0140-6736(20)30045-3/fulltext
kidneystones
Kleptomania
Leukemia
Lumbago
lungcancer
ME
mediavictimsyndrome
Menopause
Miscarriage
MS
Nostalgia
obesity	https://www-who-int.ezproxy.uio.no/features/factfiles/obesity/en/
opioidaddiction
PMS
pollenallergy
pornaddiction
pregnancy	Maternal disorders
Prolaps
Psoriasis
rheumatoidarthritis
rupturedspleen	Missing
Schizophrenia
Selfharm
Shoppingaddiction
